# Supplementary material for: Safety and Efficacy of Topical Calcineurin Inhibitors in the Treatment of Facial and Genital Psoriasis: A Systematic Review
Source: PubMed Central journal article supplement — Acta Derm Venereol. 2023 Mar 14;103:6525. doi: 10.2340/actadv.v103.6525 (PMC10026016; doi:10.2340/actadv.v103.6525), 2023-03-14
Supplement: ActaDV-103-6525-s1.pdf [file ActaDV-103-6525-s1.pdf]

Supplementary material has been published as submitted. It has not been copyedited, typeset or checked for scientific content by Acta Dermato-Venereologica

**Table SI. Study quality assessment using the Newcastle–Ottawa Scale**

| Author            | Selection | Comparability | Outcome/exposure | Total | Study |
|-------------------|-----------|---------------|------------------|-------|-------|
| Liao et al.       | ★★★★      | ★★            | ★★★★             | 9     | RCT   |
| Lebwohl et al.    | ★★★★      | ★★            | ★★★★             | 9     | RCT   |
| Kleyn et al.      | ★★★★      | ★             | ★★★★             | 8     | RCT   |
| Kreuter et al.    | ★★★★      | ★★            | ★★★★             | 9     | RCT   |
| Gribetz et al.    | ★★★★      | ★★            | ★★★★             | 9     | RCT   |
| Bissonette et al. | ★★★       | -             | ★★★★             | 6     | OPL   |
| Rallis et al.     | ★★★       | -             | ★★★★             | 6     | OPL   |
| Freeman et al.    | ★★★       | -             | ★★★★             | 6     | OPL   |
| Brune et al.      | ★★        | -             | ★★★★             | 5     | OPL   |
| Yamamoto et al.   | ★★★       | -             | ★★★★             | 6     | OPL   |
| Yamamoto et al.   | ★★★       | -             | ★★★★             | 6     | OPL   |
| Ezquerro et al.   | ★★★       | -             | ★★★★             | 6     | OPL   |
| Jacobi et al.     | ★★★       | -             | ★★★★             | 6     | OPL   |
| Frigerio et al.   | ★★★       | -             | ★★★★             | 6     | OPL   |

OPL: Open-label study; RCT: Randomized Controlled Trial.

**Table SII. Safety of tacrolimus in the treatment of facial and genital psoriasis**

| Author & country                   | No. of patients | Itching         |                            |               | Warmth sensation |                    | Stinging/burning |                    |                            | Other                                |                    |                            |         |
|------------------------------------|-----------------|-----------------|----------------------------|---------------|------------------|--------------------|------------------|--------------------|----------------------------|--------------------------------------|--------------------|----------------------------|---------|
|                                    |                 | Tacrolimus      | Vehicle                    | p-value       | Tacrolimus       | Calcitriol         | Tacrolimus       | Calcitriol         | p-value                    | Tacrolimus                           | Calcitriol         | p-value                    |         |
| Liao et al. (25)<br><br>Taiwan     | 49              | -               |                            |               | Tacrolimus 0.03% | Calcitriol 0.0003% | Tacrolimus 0.03% | Calcitriol 0.0003% |                            | Tacrolimus 0.03%                     | Calcitriol 0.0003% |                            |         |
|                                    |                 |                 |                            |               | 4 %              | 4 %                | 4 %              | -                  |                            | Perilesional erythema                |                    | p-value                    |         |
|                                    |                 |                 |                            |               |                  |                    |                  |                    |                            | 16 %                                 | 58 %               | <i>p=0.004</i>             |         |
|                                    |                 |                 |                            |               |                  |                    |                  |                    |                            | Perilesional edema                   |                    |                            |         |
|                                    |                 |                 |                            |               |                  |                    |                  |                    |                            | -                                    | 4 %                |                            |         |
|                                    |                 |                 |                            |               |                  |                    |                  |                    |                            | Folliculitis/acne                    |                    |                            |         |
|                                    |                 |                 |                            |               |                  |                    |                  |                    |                            | 4%                                   | -                  |                            |         |
|                                    |                 |                 |                            |               |                  |                    |                  |                    |                            | IGT <sup>a</sup> excellent tolerance |                    |                            |         |
| Lebwohl et al. (40)<br><br>USA     | 167             | Tacrolimus 0.1% | Vehicle                    | p-value       | -                |                    |                  | Tacrolimus 0.1%    | Vehicle                    | p-value                              | Tacrolimus 0.1%    | Vehicle                    |         |
|                                    |                 | 7 %             | 2 %                        | <i>p=0.27</i> |                  |                    |                  |                    |                            |                                      | Hyperesthesia      |                            | p-value |
|                                    |                 |                 |                            |               |                  |                    |                  |                    | 8 %                        | 7 %                                  | <i>p=1.00</i>      | 5 %                        | -       |
| Kleyn et al. (30)<br><br>UK        | 28              | Tacrolimus 0.1% | Clobetasone butyrate 0.05% |               | -                |                    |                  | Tacrolimus 0.1%    | Clobetasone butyrate 0.05% |                                      | Flushing           |                            |         |
|                                    |                 | 4 %             | 7 %                        |               |                  |                    |                  | 14 %               | 7 %                        |                                      | Tacrolimus 0.1%    | Clobetasone butyrate 0.05% |         |
|                                    |                 |                 |                            |               |                  |                    |                  |                    |                            |                                      | 4 %                | 7 %                        |         |
| Bisonette et al.(37)<br><br>Canada | 12              | Tacrolimus 0.1% | -                          |               |                  | Tacrolimus 0.1%    | -                |                    |                            | -                                    |                    |                            |         |
|                                    |                 | 17 %            |                            |               |                  | Tacrolimus 0.1%    |                  |                    |                            |                                      |                    |                            | 41 %    |
| Rallis et al. (28)<br><br>Greece   | 10              | -               |                            |               | -                |                    | -                |                    |                            | No adverse effects                   |                    |                            |         |
| Freeman et al.(39)<br><br>USA      | 21              | Tacrolimus 0.1% | -                          |               |                  | Tacrolimus 0.1%    | -                |                    |                            | -                                    |                    |                            |         |
|                                    |                 | 5 %             |                            |               |                  | Tacrolimus 0.1%    |                  |                    |                            |                                      |                    |                            | 5 %     |
| Brune et al.(41)<br><br>USA        | 11              | Tacrolimus 0.1% | -                          |               |                  | -                  |                  |                    | -                          |                                      |                    |                            |         |
|                                    |                 | 9 %             |                            |               |                  |                    |                  |                    |                            |                                      |                    | -                          |         |

|                               |    |   |                 |                 |                                                                                       |   |
|-------------------------------|----|---|-----------------|-----------------|---------------------------------------------------------------------------------------|---|
| Yamamoto et al. (23)<br>Japan | 21 | - | -               | -               | Tingling                                                                              |   |
|                               |    |   |                 |                 | Tacrolimus 0.1%                                                                       |   |
|                               |    |   |                 |                 | 19 %                                                                                  |   |
| Yamamoto et al. (24)<br>Japan | 11 | - | -               | -               | No local adverse effects.<br>No adverse effects on liver or renal function were noted |   |
| Ezquerro et al. (33)<br>Spain | 15 | - | Tacrolimus 0.1% | -               | -                                                                                     | - |
|                               |    |   | 13 %            |                 |                                                                                       |   |
| Steele et al. (42)<br>USA     | 13 | - | -               | Tacrolimus 0.1% | -                                                                                     | - |
|                               |    |   |                 | 8 %             |                                                                                       |   |
| Yamamoto et al. (22)<br>Japan | 2  | - | -               | -               | No adverse effects were noted                                                         |   |
| Yamamoto et al. (19)<br>Japan | 1  | - | -               | -               | Deep dermatophytosis with tinea corporis.                                             |   |

IGT: Investigator's global tolerance of target area.

<sup>a</sup>IGT: Scale 0-2 (poor, good, excellent) based on perilesional erythema, perilesional edema, mild/moderate stinging burning, folliculitis/acne breakout.

**Table III. Safety of pimecrolimus in the treatment of facial and genital psoriasis**

| Author & Country               | No. of patients | Itching          |                     |                    |         | Warmth sensation |                     |                    |         | Stinging/burning |                     |                    |         | Other                             |                     |                    |         |
|--------------------------------|-----------------|------------------|---------------------|--------------------|---------|------------------|---------------------|--------------------|---------|------------------|---------------------|--------------------|---------|-----------------------------------|---------------------|--------------------|---------|
|                                |                 | Pimecrolimus 1%  | Calcipotriol 0.005% | Betamethasone 0.1% | Vehicle | Pimecrolimus 1%  | Calcipotriol 0.005% | Betamethasone 0.1% | Vehicle | Pimecrolimus 1%  | Calcipotriol 0.005% | Betamethasone 0.1% | Vehicle | Pimecrolimus 1%                   | Calcipotriol 0.005% | Betamethasone 0.1% | Vehicle |
| Kreuter et al. (26)<br>Germany | 80              | 25 %             | -                   | -                  | -       | -                | 10 %                | -                  | -       | 25 %             | -                   | -                  | -       | Erythema                          |                     |                    |         |
|                                |                 | -                | -                   | -                  | -       | -                | -                   | -                  | -       | -                | -                   | -                  | -       | 10 %                              | -                   | -                  |         |
|                                |                 | Herpes genitalis |                     |                    |         |                  |                     |                    |         |                  |                     |                    |         |                                   |                     |                    |         |
|                                |                 | -                | -                   | -                  | -       | -                | -                   | -                  | -       | -                | -                   | -                  | -       | -                                 | -                   | -                  | 5 %     |
| Gribetz et al. (38)<br>USA     | 57              | -                |                     |                    |         | -                |                     |                    |         | -                |                     |                    |         | Pimecrolimus 1%                   | Vehicle             |                    |         |
|                                |                 | Paresthesia      |                     |                    |         |                  |                     |                    |         |                  |                     |                    |         |                                   |                     |                    |         |
|                                |                 | 4 %              |                     |                    |         |                  |                     |                    |         |                  |                     |                    |         |                                   |                     |                    |         |
|                                |                 | Tenderness       |                     |                    |         |                  |                     |                    |         |                  |                     |                    |         |                                   |                     |                    |         |
| Jacobi et al. (27)<br>Germany  | 20              | -                |                     |                    |         | Pimecrolimus 1%  |                     |                    |         | -                |                     |                    |         | -                                 |                     |                    |         |
|                                |                 |                  |                     |                    |         | 10 %             |                     |                    |         |                  |                     |                    |         |                                   |                     |                    |         |
| Frigerio et al.(31)<br>Italy   | 40              | Pimecrolimus 1%  |                     |                    |         | -                |                     |                    |         | Pimecrolimus 1%  |                     |                    |         | -                                 |                     |                    |         |
|                                |                 | 2.5 %            |                     |                    |         |                  |                     |                    |         | 2.5 %            |                     |                    |         |                                   |                     |                    |         |
| Canpolat et al. (20)<br>Turkey | 1               | -                |                     |                    |         | -                |                     |                    |         | -                |                     |                    |         | No adverse effects were observed. |                     |                    |         |
